# Supplementary material
Source: ML conference proceedings conference paper supplement (https://openreview.net/forum?id=jL0EsbfbAV)

**Trial 321; Dim 17**

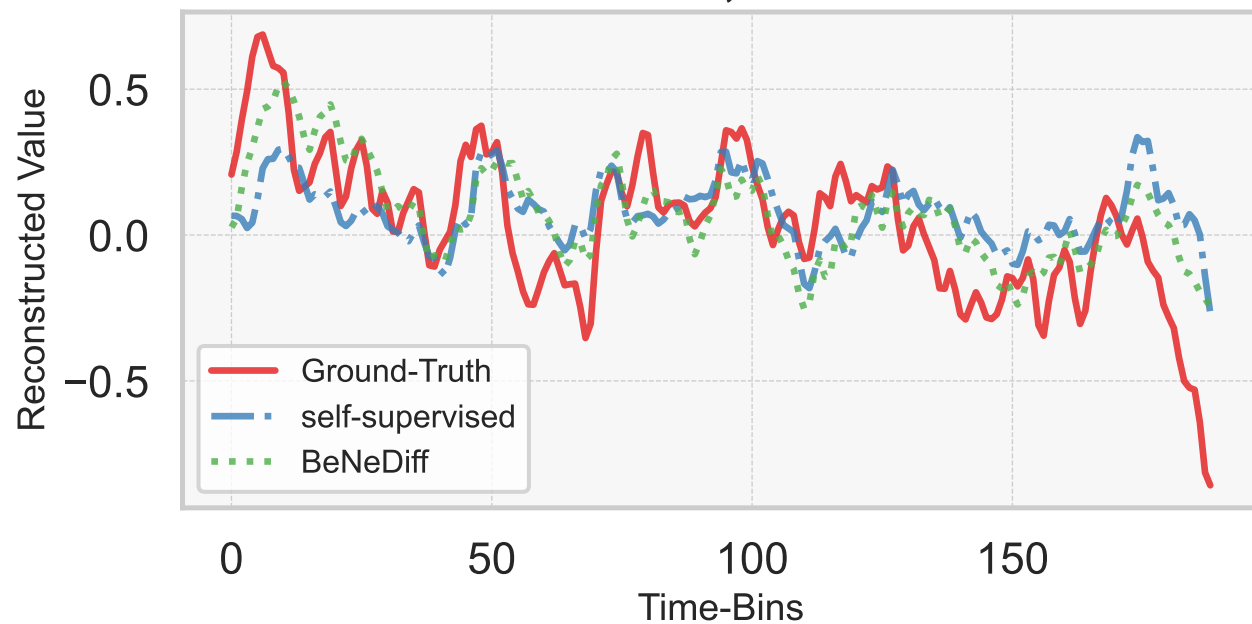

**Trial 321; Dim 3**

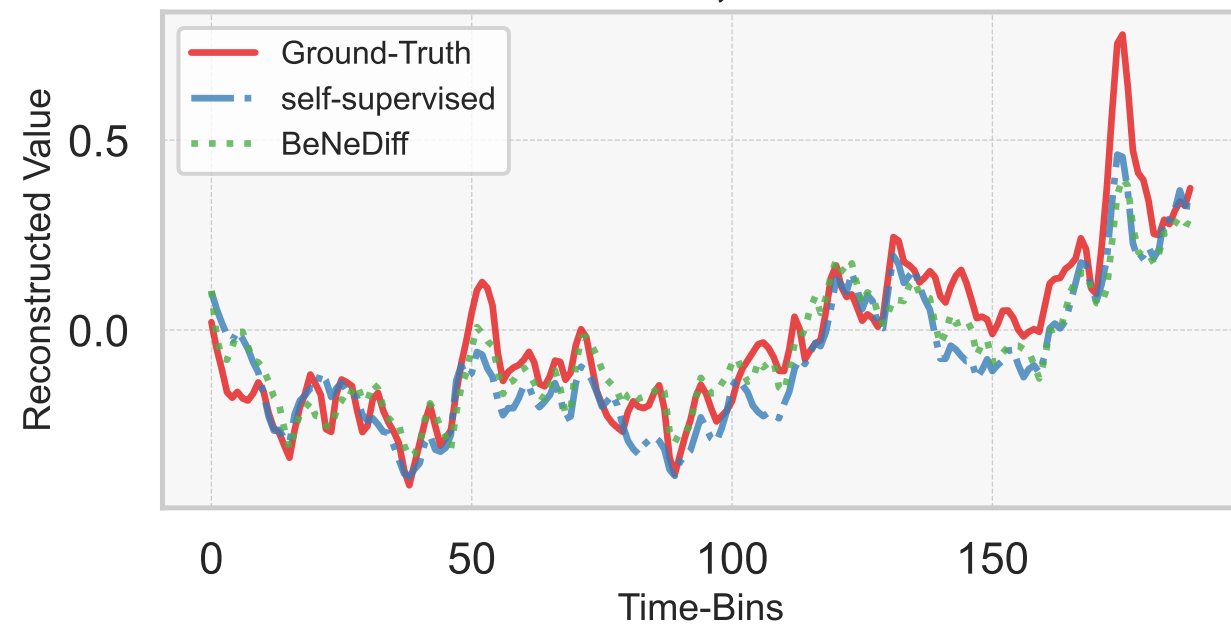

**Trial 33; Dim 17**

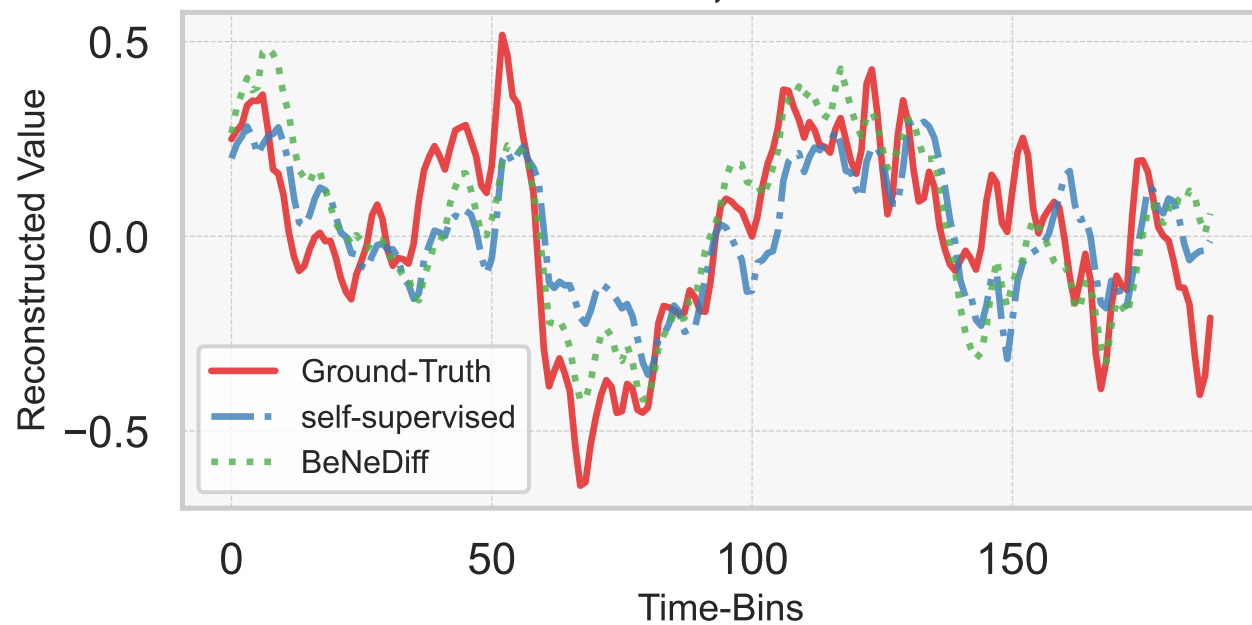

**Trial 33; Dim 3**

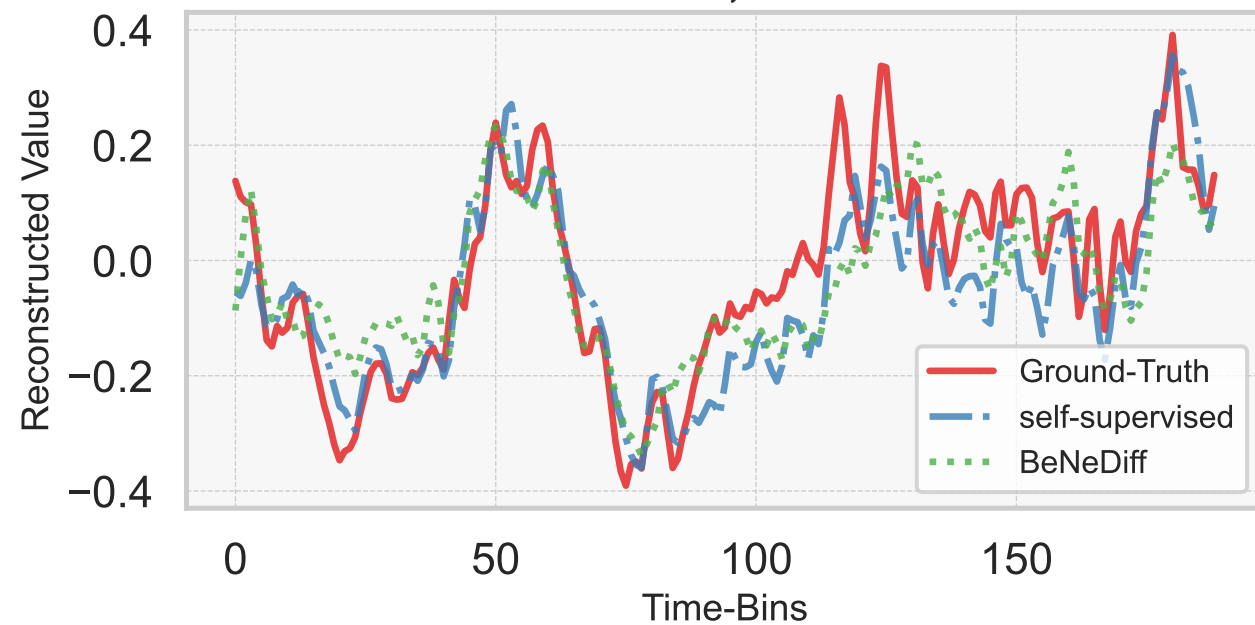

Supplement: supplementary_material [file attachment]
